# Supplementary material for: Hierarchy in the home cage affects behaviour and gene expression in group-housed C57BL/6 male mice
Source: PubMed Central journal article supplement (PMC5539312; doi:10.1038/s41598-017-07233-5), 2017-08-01
Supplement: 41598_2017_7233_MOESM2_ESM.pdf [file 41598_2017_7233_MOESM2_ESM.pdf]

## Hierarchy in the home cage affects behaviour and gene expression in group-housed C57BL/6 male mice

Yasuyuki Horii, Tatsuhiro Nagasawa, Hiroyuki Sakakibara, Aki Takahashi, Akira Tanave, Yuki Matsumoto, Hiromichi Nagayama, Kazuto Yoshimi, Michiko T. Yasuda, Kayoko Shimoi, Tsuyoshi Koide

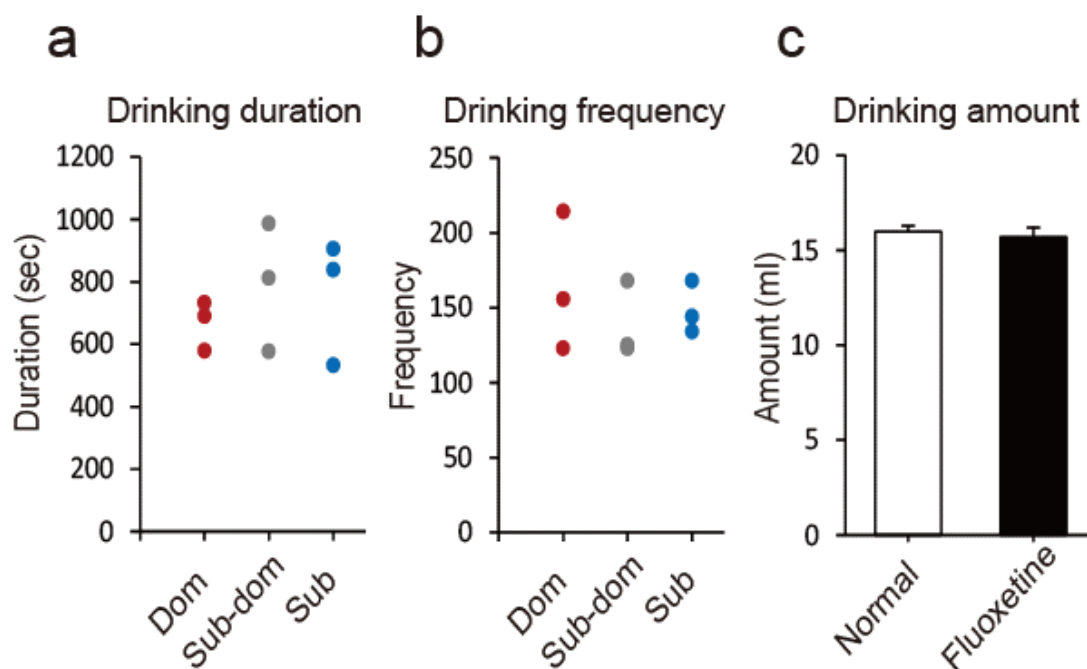

**Figure S1. Comparison of fluid intake during fluoxetine treatment**

(a and b) Drinking duration and frequency for group-housed mice with different social ranks ( $n=3$  cages). We measured duration and frequency of fluid intake by video observation. Fluid intake was observed using 24-h videos recorded between 18:00 of day 12 to 18:00 of day 13 of fluoxetine treatment and during normal water treatment before the fluoxetine treatment. Drinking behaviour was detected when the mouth of the animal touched the nozzle of the water or fluoxetine fluid bottles. (c) Amount of normal water and fluoxetine-containing water consumed before and during the fluoxetine treatment, respectively ( $n=16$  cages).

**Table S1. Correlation between frequency of agonistic behaviour and gene expression in the brain**

|              |                | Offensive behaviors  |                      | Defensive behaviors   |                      |
|--------------|----------------|----------------------|----------------------|-----------------------|----------------------|
|              |                | Ag act               | Sub act              | Ag received           | Sub react            |
| Hypothalamus | <i>Crh</i>     | #P=0.0607, r=-0.5557 | #P=0.0568, r=-0.5627 | #P=0.0520, r= 0.05719 | n.s.                 |
| Hippocampus  | <i>Bdnf</i>    | *P=0.0142, r= 0.5990 | n.s.                 | n.s.                  | n.s.                 |
|              | <i>Trkb</i>    | n.s.                 | n.s.                 | n.s.                  | n.s.                 |
|              | <i>Gr</i>      | n.s.                 | n.s.                 | n.s.                  | n.s.                 |
|              | <i>Creb1</i>   | #P=0.0502, r=-0.5135 | *P=0.0102, r=-0.6401 | n.s.                  | n.s.                 |
|              | <i>5-Htr1a</i> | n.s.                 | n.s.                 | # P=0.0878, r= 0.4558 | n.s.                 |
|              | <i>5-Htr1b</i> | n.s.                 | n.s.                 | n.s.                  | n.s.                 |
|              | <i>5-Htr2a</i> | n.s.                 | #P=0.0859, r=-0.4427 | n.s.                  | n.s.                 |
|              | <i>5-Htr2c</i> | n.s.                 | n.s.                 | n.s.                  | n.s.                 |
|              | <i>5-Htr3a</i> | n.s.                 | n.s.                 | n.s.                  | n.s.                 |
|              | <i>5-Htr4</i>  | *P=0.0330, r=-0.5344 | *P=0.0274, r=-0.5496 | n.s.                  | *P=0.0314, r= 0.5386 |
|              | <i>5-Htr7</i>  | n.s.                 | n.s.                 | n.s.                  | n.s.                 |

Correlation between frequency of agonistic behaviour and gene expression level were examined by Spearman's rank correlation test. Cells shaded in green and red indicate the *P*-values were less than 0.1 and 0.05, respectively.

**Table S2. Primer sequences used in the study**

| Gene           | Forward primer         | Reverse primer        | Reference                         |
|----------------|------------------------|-----------------------|-----------------------------------|
| <i>Crh</i>     | Mm01293920_s1          |                       | purchased from Applied Biosystems |
| <i>Bdnf</i>    | Mm04230607_s1          |                       | purchased from Applied Biosystems |
| <i>Trkb</i>    | AAGGACTTTCATCGGGAAGCTG | TCGCCCTCCACACAGACAC   | PMID: 21038447                    |
| <i>Creb1</i>   | GGAATCTGGAGCAGACAACC   | ATAACGCCATGGACCTGGAC  | PMID:20002201                     |
| <i>Gr</i>      | CAAAGCCGTTTCACTGTCC    | ACAATTTCACTGCCACC     | PMID:12714642                     |
| <i>5-Htr1a</i> | Mm00434106_s1          |                       | purchased from Applied Biosystems |
| <i>5-Htr1b</i> | TATCACCTGTTGCACTGCTT   | GAGATGGAGAAGACCCACAC  | PMID:20002201                     |
| <i>5-Htr2a</i> | AGAACCCCATTCACCATAGC   | ATCCTGTAGCCCGAAGACTG  | PMID:20002201                     |
| <i>5-Htr2c</i> | GATTGGACTGAGGGACGAAA   | ATGAAGAATGCCACGAAGGA  | PMID:20002201                     |
| <i>5-Htr3a</i> | CTTCCCCTTTGATGTGCAG    | CCACTCGCCCTGATTTATG   | PMID:20002201                     |
| <i>5-Htr4</i>  | TTCCCTGGACAGGTATTACGC  | ATAGCCAAGCCAGAGGAAAG  | PMID:16037544                     |
| <i>5-Htr7</i>  | TTCTGCAACGTCTTCATCG    | ATTCTGCCTCACGGGGTA    | PMID:20002201                     |
| <i>Gapdh</i>   | TGTGTCCGTCGTGGATCTGA   | TTGCTGTTGAAGTCGCAGGAG | PMID:17140451                     |
